# Supplementary material for: Biodegradable, crosslinked silicone-gelatin hydrogels
Source: Royal Society of Chemistry journal article supplement (doi:10.1039/d4gc00402g), 2024-01-01
Supplement: d4gc00402g1.pdf [file d4gc00402g1.pdf]

## Biodegradable Silicone-Gelatin Hydrogels

Kaitlyn E. C. Silverthorne,<sup>a</sup> Erin M. Donahue-Boyle,<sup>a</sup> Ana Pricu,<sup>a</sup> Angela Yayun Li<sup>a</sup> and Michael A. Brook<sup>a\*</sup>

### Electronic Supporting Information (ESI)

|                                                                                                                                                                                                                                                                                                                                                                                                            |    |
|------------------------------------------------------------------------------------------------------------------------------------------------------------------------------------------------------------------------------------------------------------------------------------------------------------------------------------------------------------------------------------------------------------|----|
| TABLE S1. RECIPES FOR GELATIN/SILICONE COPOLYMERS WITHOUT CROSSLINKING.....                                                                                                                                                                                                                                                                                                                                | 1  |
| TABLE S2. YOUNG'S MODULUS OF GELATIN/SILICONE COPOLYMERS PREPARED WITHOUT CHEMICAL CROSSLINKING. ....                                                                                                                                                                                                                                                                                                      | 1  |
| TABLE S3. HYDRATION OF THE AS-PRODUCED CROSSLINKED GELS (DATA ADDED TO TABLE 4, MAIN TEXT).....                                                                                                                                                                                                                                                                                                            | 2  |
| TABLE S4. CHANGES IN MASS AFTER DRYING ON THE BENCH (7 DAYS) OR IN AN OVEN AT 60 °C (24 H) OF HYDROGELS AND HCHO CROSSLINKED HYDROGELS. ....                                                                                                                                                                                                                                                               | 3  |
| TABLE S5. CONTACT ANGLE (°) OF AIR AND OVEN-DRIED HYDROGELS PRODUCED USING VARYING: GELATIN:SILICONE RATIOS AND AMOUNTS OF FORMALDEHYDE CROSSLINKER. ....                                                                                                                                                                                                                                                  | 4  |
| TABLE S6. YOUNG'S MODULUS OF HCHO CROSSLINKED GELATIN/SILICONE COPOLYMERS. ....                                                                                                                                                                                                                                                                                                                            | 5  |
| TABLE S7. EXTRACTION EFFICIENCY OF GELATIN/SILICONE POLYMERS.....                                                                                                                                                                                                                                                                                                                                          | 6  |
| TABLE S8. SUMMARY OF DEGRADATION OUTCOMES.....                                                                                                                                                                                                                                                                                                                                                             | 10 |
| FIGURE S1 A) CONTACT ANGLE OF AIR-DRIED GELATIN/SILICONE HYDROGELS CROSSLINKED WITH VARIOUS AMOUNTS OF FORMALDEHYDE: <b>T37-33</b> , <b>T37-50</b> AND <b>T37-67</b> . B) YOUNG'S MODULI OF GELATIN/ <b>T37</b> OPTIONALLY CROSSLINKED WITH HCHO (5 EQUIV). C) THE CROSSLINKED HYDRATED AND AIR-DRIED SAMPLES ARE COMPARED (THE DATA FROM FIGURE 4 IS PLOTTED SHOWING ONLY THE CROSSLINKED POLYMERS). .... | 5  |
| FIGURE S2. <sup>1</sup> H NMR: WATER EXTRACT OF SAMPLE CONTAINING 1:1 <b>T37</b> : GELATIN WITH 5 EQUIVALENTS FORMALDEHYDE. BOTH SILICONE AND PROTEIN MOIETIES ARE PRESENT, SUGGESTING THAT CROSS COUPLING HAS OCCURRED.....                                                                                                                                                                               | 6  |
| FIGURE S3. DEGRADATION DATA FROM MATERIAL CONTAINING 2:1 <b>T37</b> :GELATIN AND CROSSLINKED WITH 5 EQUIVALENTS OF HCHO : <sup>1</sup> H NMR SPECTRUM OF A) SILICONE FRACTION (AMINAL LINKAGE AT ~3.65 PPM); B) AQUEOUS FRACTION AND C) IR SPECTRUM OF RECOVERED RUBBER, SHOWING VERY LITTLE PROTEIN CONTENT. ....                                                                                         | 8  |
| FIGURE S4. FTIR SPECTRUM OF CHEMICALLY CROSSLINKED <b>P10-50</b> A) AS PREPARED, AFTER DEGRADATION WITH BROMELAIN B) SILICONE FRACTION, C) AQUEOUS FRACTION. FTIR SPECTRUM OF CHEMICALLY CROSSLINKED <b>T670-50</b> D) AS PREPARED, E AQUEOUS FRACTION.....                                                                                                                                                | 10 |

Table S1. Recipes for gelatin/silicone copolymers without crosslinking

| Product        | Mass Silicone<br>(g, mmol) | Mass<br>Gelatin (g) | Volume<br>Water (mL) |
|----------------|----------------------------|---------------------|----------------------|
| <b>T37-67</b>  | 6.6 (2.2)                  | 3.3                 | 17                   |
| <b>T37-50</b>  | 5.0 (1.7)                  | 5.0                 | 25                   |
| <b>T37-33</b>  | 3.3 (1.1)                  | 6.6                 | 33                   |
| <b>T8-50</b>   | 2.5 (2.3)                  | 2.5                 | 13                   |
| <b>T334-50</b> | 2.5 (0.1)                  | 2.5                 | 13                   |
| <b>P10-50</b>  | 2.5 (1.4)                  | 2.5                 | 13                   |

Table S2. Young's Modulus of gelatin/silicone copolymers prepared without chemical crosslinking.

| Gelatin:Silicone Ratio (Mass) | Young's Modulus (kPa, n = 3) |               |
|-------------------------------|------------------------------|---------------|
|                               | Hydrated                     | Air-Dried     |
| Gelatin                       | 80.4 ± 15.40                 | 3487 ± 2292   |
| <b>T37-67</b>                 | 32.88 ± 1.995                | 418.3 ± 28.05 |
| <b>T37-50</b>                 | 47.16 ± 4.525                | 1924 ± 1218   |
| <b>T37-33</b>                 | 36.90 ± 8.619                | 2074 ± 299.7  |

Table S3. Hydration of the as-produced crosslinked gels (data added to Table 4, main text)

| Product <sup>a</sup>      | Mass Silicone (g, mmol, equiv NH <sub>2</sub> ) | Mass Gelatin (g) <sup>b</sup> | Equiv. HCHO Relative to NH <sub>2</sub> (mmol) <sup>c</sup> | Volume 37% HCHO Solution (μL) | Mass water <sup>d</sup> | mass other | % water |
|---------------------------|-------------------------------------------------|-------------------------------|-------------------------------------------------------------|-------------------------------|-------------------------|------------|---------|
| <b>T37-67</b>             | 6.60                                            | 3.30                          | 1 (4.4)                                                     | 438.00                        | 16.7                    | 9.9        | 62.7    |
|                           |                                                 |                               | 2 (8.8)                                                     | 876.00                        | 16.8                    | 9.9        | 63.0    |
|                           |                                                 |                               | 5 (22)                                                      | 2190.00                       | 17.3                    | 9.9        | 63.6    |
|                           |                                                 |                               | 7.5 (33)                                                    | 3286.00                       | 17.7                    | 9.9        | 64.2    |
|                           |                                                 |                               | 10 (44)                                                     | 4382.00                       | 18.1                    | 9.9        | 64.7    |
| <b>T37-50</b>             | 5.00                                            | 5.00                          | 1 (3.3)                                                     | 332.00                        | 25.1                    | 10.0       | 71.5    |
|                           |                                                 |                               | 2 (6.7)                                                     | 664.00                        | 25.2                    | 10.0       | 71.6    |
|                           |                                                 |                               | 5 (17)                                                      | 1660.00                       | 25.6                    | 10.0       | 71.9    |
|                           |                                                 |                               | 7.5 (25)                                                    | 2490.00                       | 25.9                    | 10.0       | 72.2    |
|                           |                                                 |                               | 10 (33)                                                     | 3320.00                       | 26.2                    | 10.0       | 72.4    |
| <b>T37-33</b>             | 3.30                                            | 6.60                          | 1 (2.2)                                                     | 219.00                        | 33.1                    | 9.9        | 77.0    |
|                           |                                                 |                               | 2 (4.4)                                                     | 438.00                        | 33.2                    | 9.9        | 77.0    |
|                           |                                                 |                               | 5 (11)                                                      | 1095.00                       | 33.4                    | 9.9        | 77.1    |
|                           |                                                 |                               | 7.5 (17)                                                    | 1643.00                       | 33.6                    | 9.9        | 77.2    |
|                           |                                                 |                               | 10 (22)                                                     | 2191.00                       | 33.8                    | 9.9        | 77.4    |
| <b>T8-50</b>              | 2.50                                            | 2.50                          | 5 (28)                                                      | 2766.00                       | 3.5                     | 5.0        | 41.3    |
| <b>T334-50</b>            | 2.50                                            | 2.50                          | 5 (1.0)                                                     | 100.00                        | 2.5                     | 5.0        | 33.7    |
| <b>P10-50<sup>e</sup></b> | 2.50                                            | 2.50                          | 5 (14)                                                      | 1351.00                       | 13.0                    | 5.0        | 72.2    |

<sup>a</sup> The starting silicone is indicated at the beginning of each hydrogel product number. <sup>b</sup> Gelatin dry weight. <sup>c</sup> HCHO concentrations were based on the known quantity of silicone amines. <sup>d</sup> Water:gelatin 5:1 + the water in the formaldehyde solution (37%). <sup>e</sup> This value is for each amine monomer (MeSi(CH<sub>2</sub>)<sub>3</sub>NH<sub>2</sub>O:Me<sub>2</sub>SiO~1:9 (Me<sub>3</sub>SiO(MeSi(CH<sub>2</sub>)<sub>3</sub>NH<sub>2</sub>O)<sub>3</sub>(Me<sub>2</sub>SiO)<sub>27</sub>SiMe<sub>3</sub>); molar mass 2000-3000 g mol<sup>-1</sup>).

Table S4. Changes in mass after drying on the bench (7 days) or in an oven at 60 °C (24 h) of hydrogels and HCHO crosslinked hydrogels.

| Silicone      | Equivalents of Formaldehyde | Water Content, Air-Dried (% of original) | Water Content, Oven-Dried (% of original) |
|---------------|-----------------------------|------------------------------------------|-------------------------------------------|
| <b>T37-67</b> | 0                           | 3                                        | <1                                        |
|               | 1                           | 7                                        | <1                                        |
|               | 2                           | 7                                        | <1                                        |
|               | 5                           | 8                                        | <1                                        |
|               | 7.5                         | 18                                       | 4                                         |
|               | 10                          | 12                                       | <1                                        |
| <b>T37-50</b> | 0                           | 5                                        | <1                                        |
|               | 1                           | 9                                        | <1                                        |
|               | 2                           | 12                                       | <1                                        |
|               | 5                           | 11                                       | <1                                        |
|               | 7.5                         | 6                                        | <1                                        |
|               | 10                          | 18                                       | 1                                         |
| <b>T37-33</b> | 0                           | 9                                        | <1                                        |
|               | 1                           | 17                                       | <1                                        |
|               | 2                           | 18                                       | <1                                        |
|               | 5                           | 14                                       | <1                                        |
|               | 7.5                         | 20                                       | <1                                        |
|               | 10                          | 8                                        | <1                                        |

Table S5. Contact angle (°) of air and oven-dried hydrogels produced using varying: gelatin:silicone ratios and amounts of formaldehyde crosslinker.

| Silicone                  | Equivalents of Formaldehyde | Water Contact Angle (°, n = 3) |              |              |             |
|---------------------------|-----------------------------|--------------------------------|--------------|--------------|-------------|
|                           |                             | Hydrated                       | Oven-Dried   | Air-Dried    |             |
| Gelatin (Control)         | 0                           | 79.6 ± 15.0                    | 102.6 ± 5.7  | 99.7 ± 27.0  |             |
|                           | 5 (rel. to T37)             | 92.1 ± 11.0                    | 98.4 ± 8.8   | 95.4 ± 5.7   |             |
| <b>T8-100</b> (Control)   | 1                           | -                              | -            | 96.3 ± 12.3  |             |
| <b>T8-50</b>              | 5                           | 81.9 ± 6.4                     | 102.8 ± 16.4 | 99.0 ± 16.4  |             |
| <b>T37-100</b> (Control)  | 1                           | -                              | -            | 106.3 ± 16.3 |             |
| <b>T37-67</b>             | 0                           | 67.3 ± 6.4                     | 59.9 ± 4.1   | 82.3 ± 10.7  |             |
|                           | 1                           | 72.5 ± 8.8                     | 103.7 ± 19.2 | 91.9 ± 21.1  |             |
|                           | 2                           | 82.1 ± 1.2                     | 118.2 ± 4.4  | 109.5 ± 3.9  |             |
|                           | 5                           | 71.7 ± 10.5                    | 79.0 ± 8.0   | 102.8 ± 6.5  |             |
|                           | 7.5                         | 88.0 ± 13.0                    | 102.1 ± 20.0 | 88.3 ± 7.5   |             |
|                           | 10                          | 86.0 ± 24.1                    | 77.3 ± 6.4   | 97.6 ± 2.9   |             |
|                           | <b>T37-50</b>               | 0                              | 89.7 ± 16.7  | 96.0 ± 8.1   | 93.0 ± 14.5 |
|                           |                             | 1                              | 77.1 ± 8.0   | 91.5 ± 9.3   | 87.3 ± 7.9  |
|                           |                             | 2                              | 86.9 ± 5.4   | 100.6 ± 7.6  | 90.2 ± 14.0 |
|                           |                             | 5                              | 69.2 ± 5.4   | 101.7 ± 13.2 | 87.7 ± 16.6 |
| <b>T37-33</b>             | 7.5                         | 77.7 ± 9.2                     | 104.5 ± 4.2  | 94.7 ± 22.1  |             |
|                           | 10                          | 68.4 ± 4.1                     | 101.0 ± 19.8 | 102.1 ± 7.6  |             |
|                           | 0                           | 60.1 ± 6.9                     | 79.6 ± 22.0  | 82.5 ± 8.6   |             |
|                           | 1                           | 89.0 ± 6.4                     | 102.9 ± 5.2  | 92.4 ± 21.7  |             |
|                           | 2                           | 82.9 ± 12.1                    | 111.3 ± 1.1  | 105.1 ± 8.1  |             |
|                           | 5                           | 84.6 ± 5.9                     | 114.0 ± 9.4  | 109.4 ± 6.1  |             |
| <b>T334-100</b> (Control) | 7.5                         | 75.7 ± 7.2                     | 104.8 ± 3.7  | 101.6 ± 8.7  |             |
|                           | 10                          | 90.6 ± 0.7                     | 98.4 ± 18.1  | 103.6 ± 16.2 |             |
|                           | 1                           | -                              | -            | 106.8 ± 8.7  |             |
|                           | 5                           | 92.3 ± 10.9                    | 110.7 ± 8.6  | 108.5 ± 4.3  |             |
| <b>P10-100</b> (Control)  | 1                           | -                              | -            | 94.6 ± 6.3   |             |
| <b>P10-50</b>             | 5                           | 83.1 ± 18.9                    | 115.9 ± 1.8  | 106.9 ± 10.2 |             |

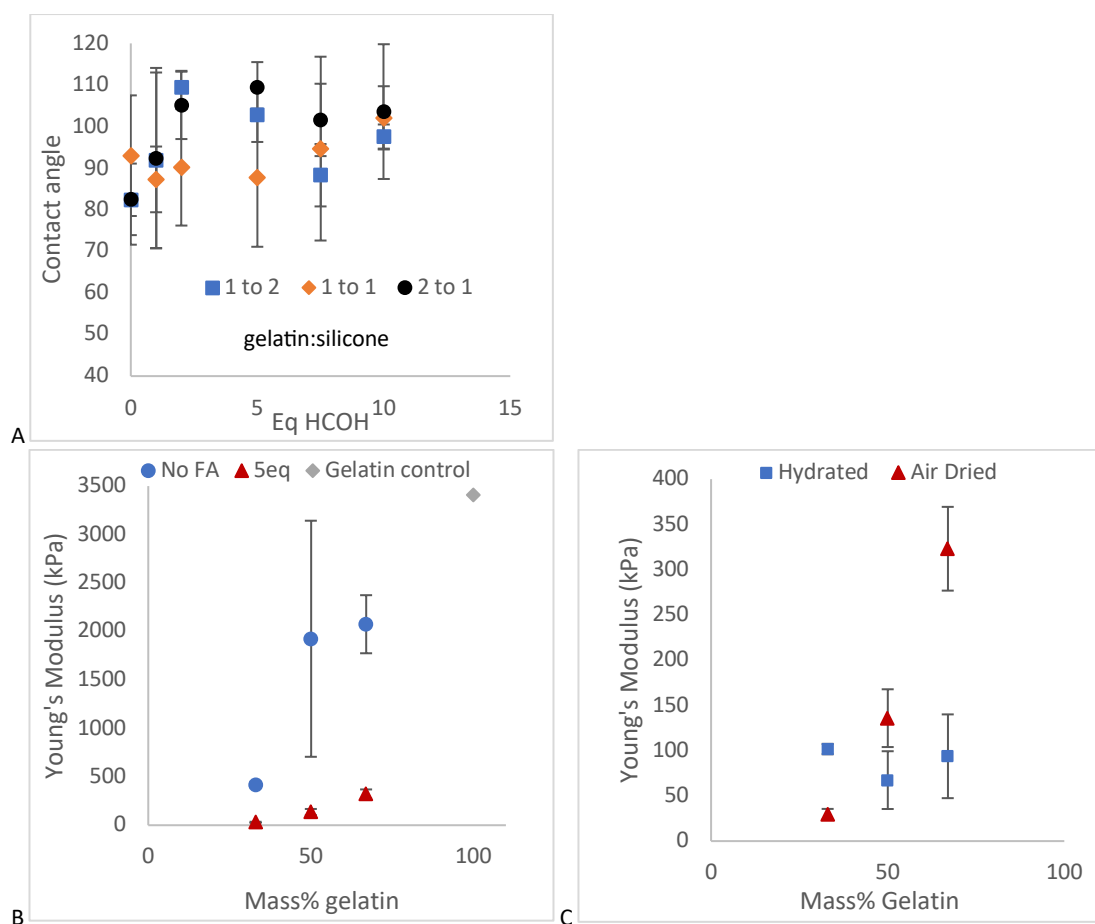

Figure S1 A) Contact angle of air-dried gelatin/silicone hydrogels crosslinked with various amounts of formaldehyde: **T37-33**, **T37-50** and **T37-67**. B) Young's moduli of gelatin/**T37** optionally crosslinked with HCHO (5 equiv). C) The crosslinked hydrated and air-dried samples are compared (the data from Figure 4 is plotted showing only the crosslinked polymers).

Table S6. Young's Modulus of HCHO crosslinked gelatin/silicone copolymers.

| Gelatin: Silicone Ratio (Mass) | Equivalents of Formaldehyde | Young's Modulus (kPa, n = 3) |               |
|--------------------------------|-----------------------------|------------------------------|---------------|
|                                |                             | Hydrated                     | Air-Dried     |
| <b>Gelatin</b>                 | 5                           | 10.92 ± 3.818                | 2010 ± 979.2  |
| <b>T37-67</b>                  | 1                           | 68.32 ± 16.33                | 635.4 ± 254.4 |
|                                | 5                           | 101.7 ± 12.44                | 588.6 ± 179.8 |
| <b>T37-50</b>                  | 1                           | 39.81 ± 10.38                | 1151 ± 349.0  |
|                                | 5                           | 67.39 ± 12.50                | 135.9 ± 31.93 |
| <b>T37-33</b>                  | 1                           | 22.86 ± 4.313                | 3620 ± 66.64  |
|                                | 5                           | 94.59 ± 21.28                | 323.1 ± 46.29 |
| <b>T334-50</b>                 | 5                           | 59.18 ± 15.43                | 929.3 ± 331.2 |
| <b>P10-50</b>                  | 5                           | 35.21 ± 11.96                | 204.5 ± 122.4 |

Table S7. Extraction efficiency of gelatin/silicone polymers

| Silicone                  | HCHO | Initial Mass (g) | Mass after H <sub>2</sub> O extraction (g) | %swelling | Mass after IPA extraction (g) | %sol       |
|---------------------------|------|------------------|--------------------------------------------|-----------|-------------------------------|------------|
| <b>T8-50</b>              | 5    | 0.571±0.04       | 0.502±0.04                                 | 136.0%    | 0.502±0.04                    | 12.2±1.0   |
| <b>T37-33</b>             | 1    | 0.262±0.06       | 0.253±0.06                                 | 165.3%    | 0.251±0.06                    | 4.04±2.0   |
|                           | 10   | 0.452±0.06       | 0.434±0.06                                 | 166.8%    | 0.432±0.06                    | 4.46±1.0   |
| <b>T37-50</b>             | 5    | 0.367±0.03       | 0.348±0.03                                 | 148.8%    | 0.346±0.03                    | 5.72±0.73  |
| <b>T37-67</b>             | 1    | 0.623±0.14       | 0.554±0.11                                 | 125.2%    | 0.550±0.10                    | 11.1±2.6   |
|                           | 10   | 0.590±0.16       | 0.534±0.13                                 | 132.9     | 0.512±0.12                    | 11.8±5.6   |
| <b>T334-50</b>            |      | 0.350±0.04       | 0.341±0.04                                 | 116.9%    | 0.331±0.04                    | 5.43±0.95  |
| <b>P10-50</b>             |      | 0.515±0.14       | 0.457±0.11                                 | 123.5%    | 0.456±0.11                    | 10.3±3.7   |
| <b>CONTROLS (Gelatin)</b> |      |                  |                                            |           |                               |            |
| Gelatin                   | 0    | 0.236            | 0.202                                      | 136.0%    | 0.198                         | 16.18±3.38 |
|                           | 5    | 0.316            | 0.251                                      | 159.0%    | 0.251                         | 21.20±2.57 |
| <b>CONTROLS (No HCHO)</b> |      |                  |                                            |           |                               |            |
| <b>T8-50</b>              |      | 0.265±0.03       | 0±0                                        | 116.3%    | 0±0                           | 79.62±2.34 |
| <b>T37-50</b>             |      | 0.256±0.10       | 0.053±0.03                                 | 121.0%    | 0.051±0.02                    | 100±0      |
| <b>T334-50</b>            |      | 0.351±0.14       | 0.197±0.14                                 | 110.5%    | 0.190±0.14                    | 46.57±33.0 |
| <b>P10-50</b>             |      | 0.230±0.02       | 0.008±0.01                                 | 106.8%    | 0.003±0.01                    | 98.48±2.15 |

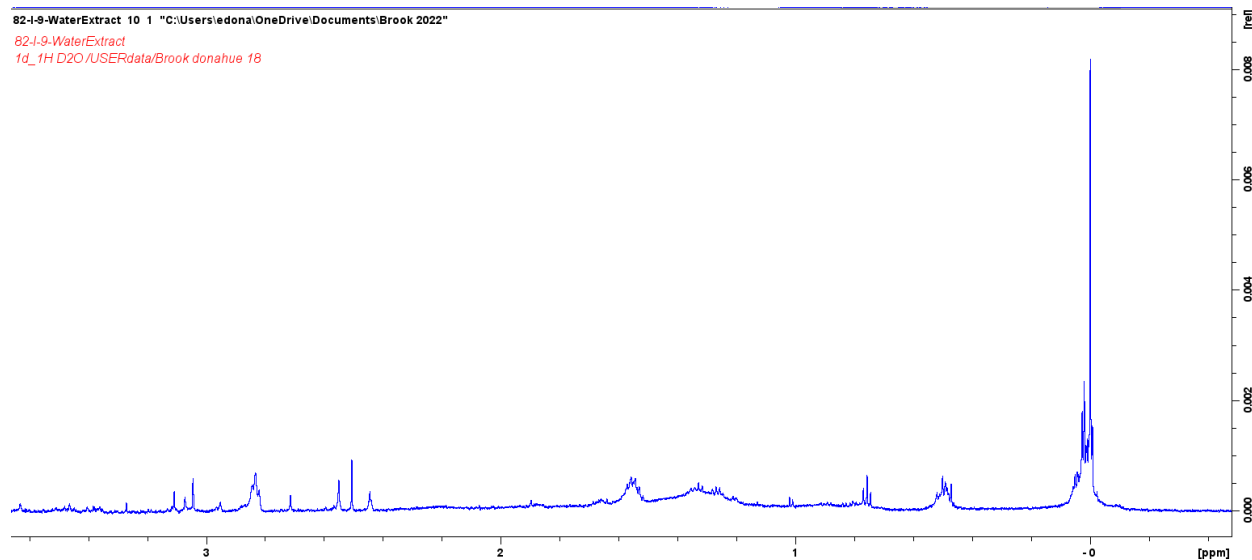

Figure S2. <sup>1</sup>H NMR: water extract of sample containing 1:1 T37: gelatin with 5 equivalents formaldehyde. Both silicone and protein moieties are present, suggesting that cross coupling has occurred.

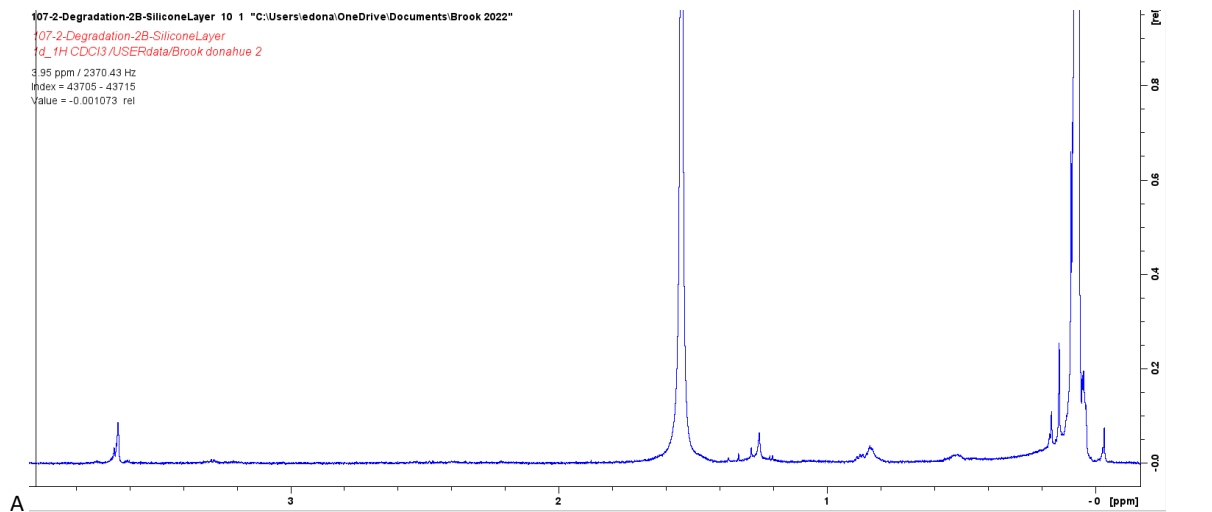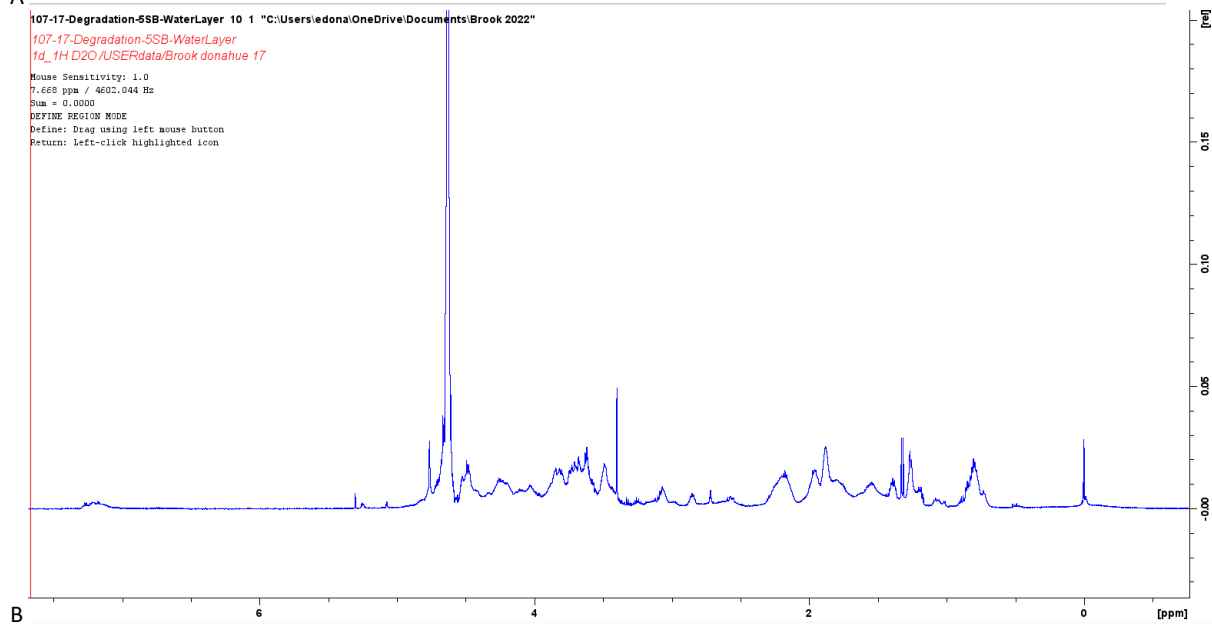

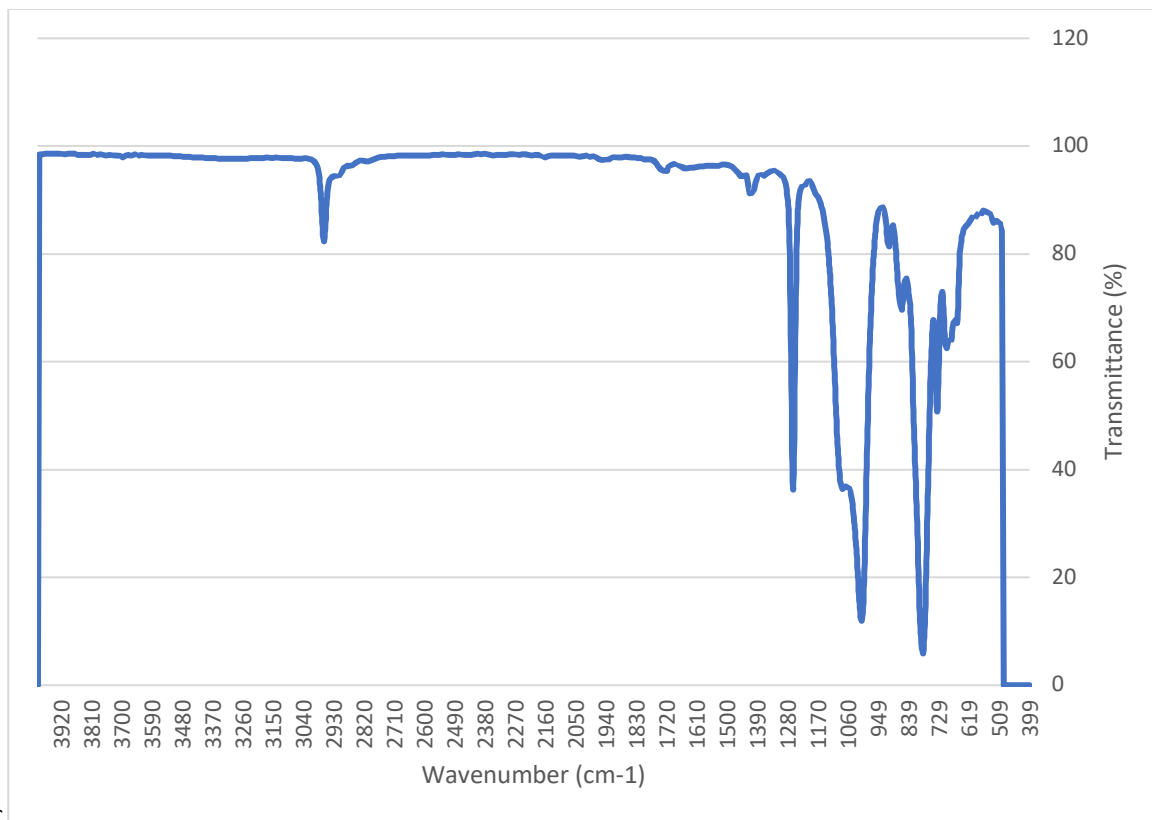

C Figure S3. Degradation data from material containing 2:1 T37:gelatin and crosslinked with 5 equivalents of HCHO : <sup>1</sup>H NMR spectrum of A) silicone fraction (aminal linkage at ~3.65 ppm); B) aqueous fraction and C) IR spectrum of recovered rubber, showing very little protein content.

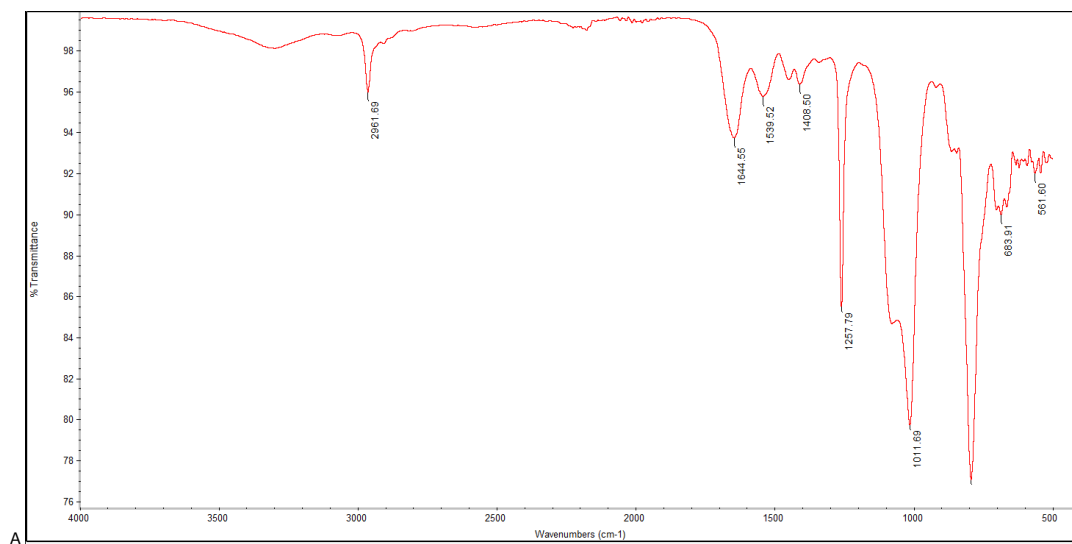



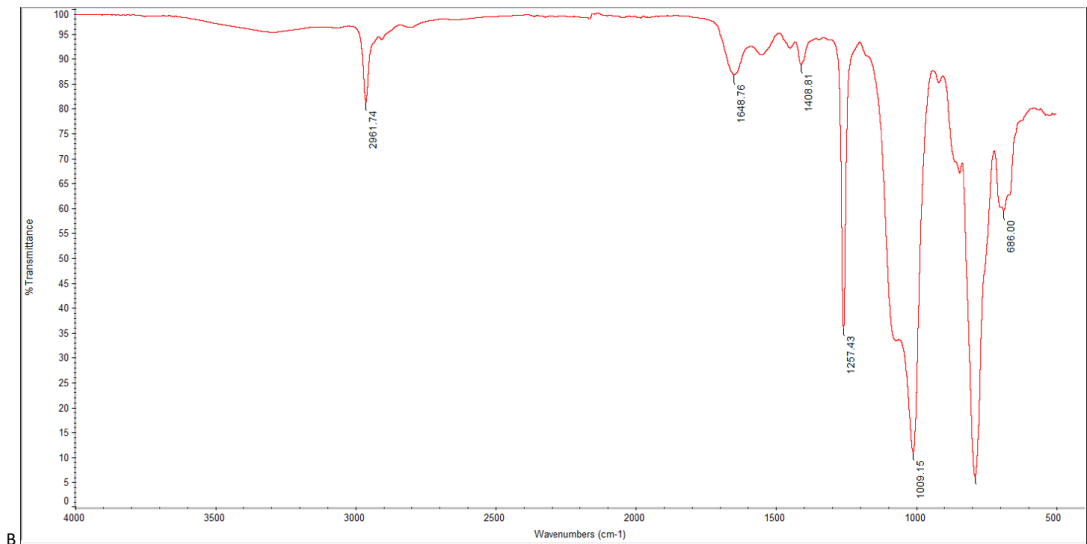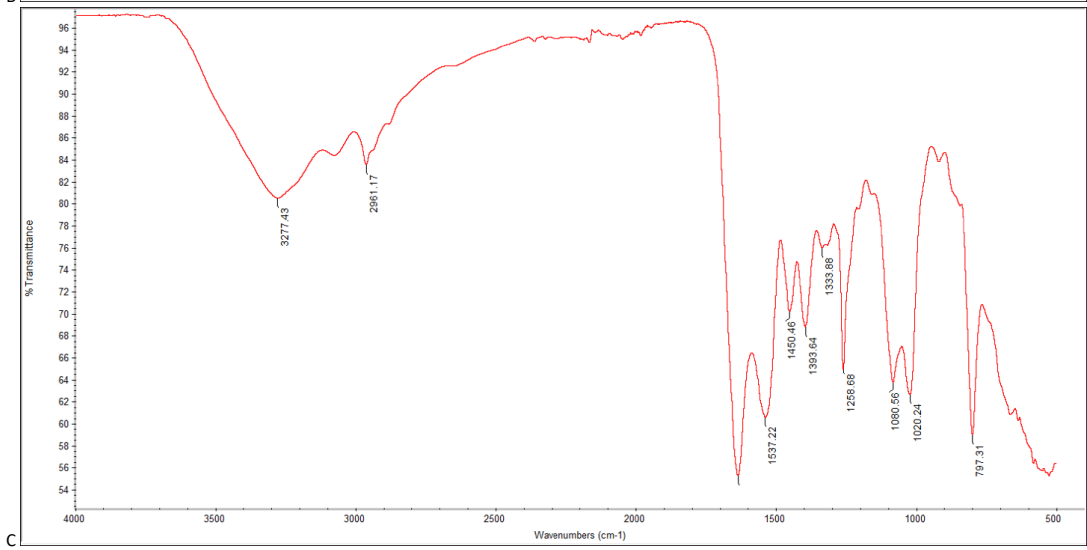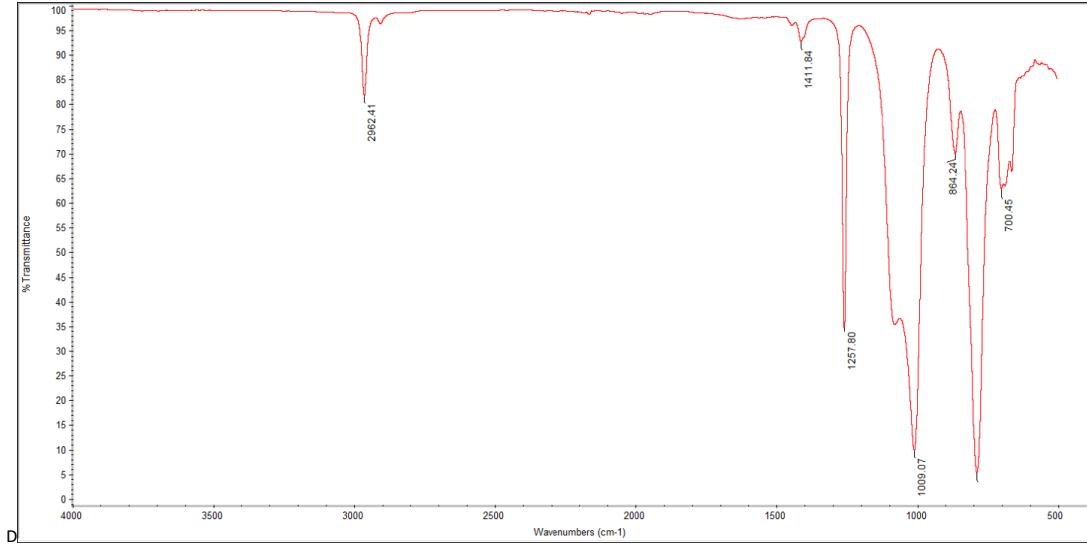

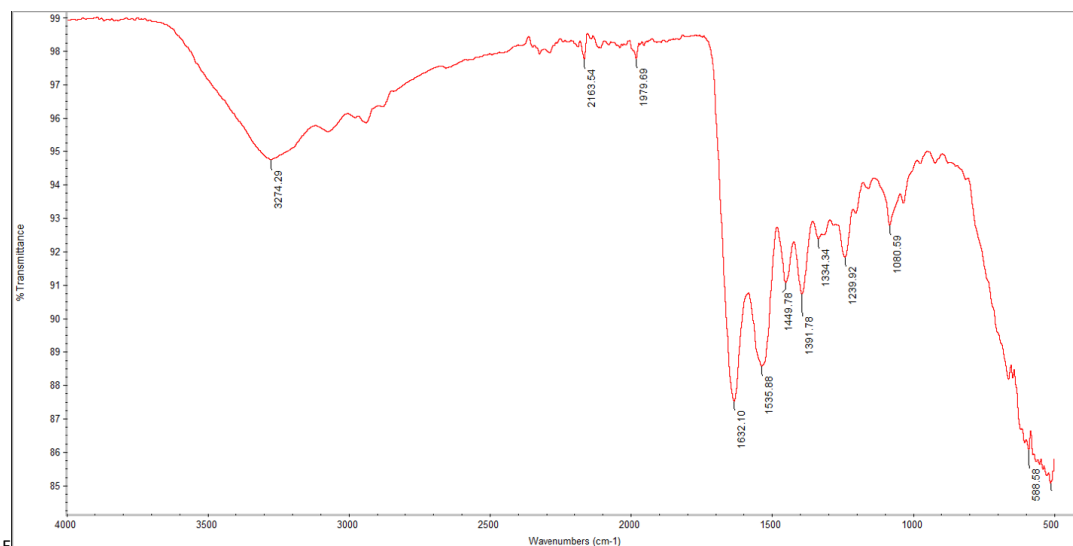

Figure S4. FTIR spectrum of chemically crosslinked **P10-50** A) as prepared, after degradation with bromelain B) silicone fraction, C) aqueous fraction. FTIR spectrum of chemically crosslinked **T670-50** D) as prepared, E) aqueous fraction.

Table S8. Summary of degradation outcomes.

| Hydrogel      | Equiv<br>HCHO | Fraction degraded after 7 Days (%) |                   |                   |
|---------------|---------------|------------------------------------|-------------------|-------------------|
|               |               | Deionized Water<br>(Control)       | 0.1%<br>Bromelain | 1.0%<br>Bromelain |
| <b>T37-67</b> | 1             | 3                                  | 99                | 95                |
|               | 2             | 6                                  | 19                | 72                |
|               | 5             | 8                                  | 2                 | 12                |
|               | 7.5           | 6                                  | 26                | 53                |
|               | 10            | 2                                  | 95                | 47                |
| <b>T37-50</b> | 1             | 2                                  | 7                 | 99                |
|               | 2             | 4                                  | 95                | 52                |
|               | 5             | 7                                  | 53                | 93                |
|               | 7.5           | 10                                 | 93                | 20                |
|               | 10            | 9                                  | 93                | 70                |
| <b>T37-33</b> | 1             | 3                                  | 95                | 99                |
|               | 2             | 6                                  | 93                | 99                |
|               | 5             | 8                                  | 49                | 95                |
|               | 7.5           | 6                                  | 95                | 99                |
|               | 10            | 2                                  | 15                | 44                |
